# Supplementary material for: Knowledge and Perception of and Attitude toward a Premarital Screening Program in Qatar: A Cross-Sectional Study
Source: MDPI journal article supplement (doi:10.3390/ijerph19074418), 2022-04-06
Supplement: s1 [file s1]

## **Supplementary 2: Questionnaire (S1 Questionnaire)**

### **Knowledge and Attitude of Premarital Screening (PMS)**

#### The questionnaire:

1. What is your age?
  - ☐ 18-21
  - ☐ 22-25
  - ☐ 26-29
  - ☐ 30 years or above
2. What is your gender?
  - ☐ Male
  - ☐ Female
3. What is your nationality? Please specify
  - ☐ Qatari
  - ☐ Non-Qatari (please specify) -----
4. What is your religion?
  - ☐ Islam
  - ☐ Christianity
  - ☐ Hinduism
  - ☐ Buddhism
  - ☐ Others, please specify-----
5. In which college are you studying at Qatar University?
  - ☐ College of Business and Economics
  - ☐ College of Sharia (Islamic studies)
  - ☐ College of Law
  - ☐ College of Engineering
  - ☐ College of Arts and Sciences
  - ☐ College of Health Sciences
  - ☐ College of Medicine
  - ☐ College of Education
  - ☐ College of Pharmacy
6. What is your current year of study in Qatar University?
  - ☐ 1<sup>st</sup> year
  - ☐ 2<sup>nd</sup> year
  - ☐ 3<sup>rd</sup> year
  - ☐ 4<sup>th</sup> year
  - ☐ 5<sup>th</sup> or more
7. Please indicate your current marital status?
  - ☐ Engaged
  - ☐ Separated
  - ☐ Divorced
  - ☐ Widowed
  - ☐ Single (never married)
8. What is the type of relation between your parents?
  - ☐ First cousins (the couple's parents are brother and sisters)
  - ☐ Second cousins (the couple's parents are cousins)
  - ☐ More distant relation
  - ☐ Not related at all
9. Have you or any of your close family member been diagnosed with a genetic disease?
  - ☐ Yes
  - ☐ No (go to question 14)

- ☐ I do not know
- 10. Have you ever undergone premarital screening?
  - ☐ Yes
  - ☐ No
- 11. What is your household income level excluding the drivers' and maids' income?
  - ☐ Less than 10,999 QAR
  - ☐ 11,000- 19,999 QAR
  - ☐ 20,000 QAR or more
- 12. Have you heard about "Premarital screening" or "genetic testing"?
  - ☐ Yes
  - ☐ No
- 13. If yes, what is the main source of your information?
  - ☐ TV
  - ☐ Friends
  - ☐ Academic course
  - ☐ Newspapers
  - ☐ Social Media
  - ☐ Health care facility
  - ☐ Other, please specify -----
- 14. Diseases targeted by Premarital Screening include (check all that apply):
  - ☐ Genetic diseases
  - ☐ Sexually transmitted diseases
  - ☐ I do not know
- 15. Blood diseases targeted by Premarital Screening include (Check all that apply):
  - ☐ Sickle cell disease
  - ☐ Thalassemia
  - ☐ G6PD deficiency
  - ☐ Heart disease
  - ☐ Diabetes
  - ☐ I do not know

Please tell me if you agree or disagree with the following:

- 16. Consanguinity (marriage between cousins) can increase the chance of having a child with a genetic disease.
  - ☐ Strongly Agree
  - ☐ Somewhat agree
  - ☐ Disagree
  - ☐ Strongly Disagree
  - ☐ Neutral
- 17. Premarital screening can reduce the occurrence of genetic diseases.
  - ☐ Strongly Agree
  - ☐ Somewhat agree
  - ☐ Disagree
  - ☐ Strongly Disagree
  - ☐ Neutral
- 18. Premarital screening can reduce the occurrence of sexually transmitted diseases.
  - ☐ Strongly Agree
  - ☐ Somewhat agree
  - ☐ Disagree
  - ☐ Strongly Disagree
  - ☐ Neutral
- 19. Genetic tests are always 100% accurate.

- ☐ Yes
  - ☐ No
  - ☐ I do not know
- 20. A genetic test must be repeated every year because the results may change.
  - ☐ Yes
  - ☐ No
  - ☐ I do not know
- 21. In case of a family having a genetic disease, this will certainly imply that every member of the family would have the disease.
  - ☐ Yes
  - ☐ No
  - ☐ I do not know
- 22. Genetic diseases can have a psychological burden on families.
  - ☐ Strongly Agree
  - ☐ Somewhat agree
  - ☐ Disagree
  - ☐ Strongly Disagree
  - ☐ Neutral
- 23. Genetic diseases can have an economic burden on families.
  - ☐ Strongly Agree
  - ☐ Somewhat agree
  - ☐ Disagree
  - ☐ Strongly Disagree
  - ☐ Neutral
- 24. Are you aware of any Islamic fatwa (edict) approving abortion if a fetus affected by genetic abnormalities?
  - ☐ Yes
  - ☐ No
  - ☐ Not applicable
- 25. What do you think is the appropriate time for doing genetic testing?
  - ☐ In high school
  - ☐ Pre-joining a college
  - ☐ Before marriage (during engagement)
- 26. Genetic testing could lead to denial of a marriage for a couple.
  - ☐ Strongly agree
  - ☐ Somewhat agree
  - ☐ Disagree
  - ☐ Strongly disagree
  - ☐ Neutral
- 27. Genetic testing will do more harm than good for society.
  - ☐ Strongly agree
  - ☐ Somewhat agree
  - ☐ Disagree
  - ☐ Strongly disagree
  - ☐ Neutral
- 28. What would be your response if you were told (after the premarital screening) that there would be a chance of having a child affected with a genetic diseases?
  - ☐ Continue engagement and get marry
  - ☐ Cancel/discontinue engagement
  - ☐ Continue engagement and get marriage for emotional reasons
  - ☐ Continue engagement and get marriage for family pressure

29. Law and regulation should ban the marriage if there is a chance of having a child affected with a genetic disease.
- ☐ Strongly agree
  - ☐ Somewhat agree
  - ☐ Disagree
  - ☐ Strongly disagree
  - ☐ Neutral
30. I prefer consanguineous marriages (marriage between cousins or relatives).
- ☐ Strongly agree
  - ☐ Somewhat agree
  - ☐ Disagree
  - ☐ Strongly disagree
  - ☐ Neutral
31. Premarital screening does not interfere with a belief in destiny.
- ☐ Strongly agree
  - ☐ Somewhat agree
  - ☐ Disagree
  - ☐ Strongly disagree
  - ☐ Neutral
32. Which sector of society should be educated about genetic diseases? (check all that apply)
- ☐ Families with genetic diseases genes detected
  - ☐ Parents
  - ☐ Young people preparing for marriage
  - ☐ Teenagers/high school students
33. Have you ever heard about screening for Sexually Transmitted Diseases (STDs) in Qatar?
- ☐ Yes
  - ☐ No
  - ☐ I do not know
34. What is the source(s) of transmission for AIDS? (Check all that apply)
- ☐ Sexual intercourse
  - ☐ Genetically inherited
  - ☐ Blood contact
  - ☐ I do not know
  - ☐ Others, please specify -----
35. HIV can be prevented by the following method(s): (Check all that apply)
- ☐ Vaccination
  - ☐ Use of condoms
  - ☐ Use of pills/drugs
  - ☐ Abstinence
  - ☐ I do not know
36. Screening for Sexually Transmitted Diseases is necessary before marriage.
- ☐ Strongly agree
  - ☐ Somewhat agree
  - ☐ Disagree
  - ☐ Strongly disagree
  - ☐ Neutral
37. If somebody discovered that during premarital that he/she has AIDS, this person should:
- ☐ Hide it from partner
  - ☐ Break the relation
  - ☐ Inform partner
  - ☐ Consult a physician
