# Supplementary material for: Knowledge and Perception of and Attitude toward a Premarital Screening Program in Qatar: A Cross-Sectional Study
Source: MDPI journal article supplement (doi:10.3390/ijerph19074418), 2022-04-06
Supplement: s1 [file s1]

## **Supplementary S1: Focus group questions**

### **Opening question:**

Are genetic diseases important health problem in Qatar? Why? What could be associated factors?

### **1) Perceive benefits:**

1- What is your perception about premarital screening? Why it is done? What does it screen for? Where it is done?

2- Do you think that premarital screening is a good practice? why?

### **2) Perceived susceptibility:**

1- Do you think that results of premarital screening will affect your marriage decision? How? To what extent?

2- Do you think your future child will have a higher chance for having some genetic diseases if you and your partner do not do the premarital screening test?

### **3) Perceived barriers:**

1- What could be a concern for you doing premarital screening?

2- Do you think doing premarital screening will prevent you from getting married if the results showed that your future child has a chance to have genetic disease?

3- Do you think doing premarital screening interfere with religion? How?

### **4) Perceive severity:**

1- If you got married without doing PMS and found that some of your children could have a chance for genetic diseases, what would you do? Would you think of getting divorce?

2- Would you agree on abortion if you find out that your expected child would have a genetic disease?

3- Do you believe that you and your future spouse could handle financial or emotional problems due to having a child with a genetic disease?

4- What do you think about marriage between partners if PMS revealed that one of them is infected with HIV? Why?

### **5) Cues to action:**

1. What would you advise a friend whose premarital screening test shows a chance of having a child with genetic disease? What would be your action if you have this similar situation?

2. Do you think that there should be a law that forbid marriage if the PMS have shown that there is a probability to have a kid affected by a genetic disease?
